# Supplementary material for: The zinc finger of DNA Ligase 3α binds to nucleosomes via an arginine anchor
Source: Research Square preprint supplement (doi:10.21203/rs.3.rs-6033068/v1), 2025-03-10
Supplement: Supplementary file 1 [file b3d14e3f48413892b36db350.pdf]

# SUPPLEMENTARY FIGURES

Nagpal *et al*

**The zinc finger of DNA Ligase 3 $\alpha$  binds to  
nucleosomes via an arginine anchor**

**Table S1. The concentration in each batch of the extracts calculated in flow-cell of c-trap and measured using the calibration curve from Fig S1.**

| EXTRACT                            |          | Dilution used in C-Trap | XRCC1-YFP nM in flow cell | Halo-Lig3 $\alpha$ nM in flow cell |
|------------------------------------|----------|-------------------------|---------------------------|------------------------------------|
| Halo-635-Lig3 $\alpha$ - XRCC1-YFP | BATCH1   | 1:10                    | 0.7                       | 0.2                                |
|                                    | BATCH2   | 1:10                    | 1.3                       | 0.11                               |
|                                    | BATCH3   | 1:10                    | 1.4                       | 0.11                               |
|                                    | BATCH4   | 1:10                    | 0.24                      | 0.16                               |
|                                    | BATCH5   | 1:10                    | 0.6                       | 0.28                               |
|                                    | BATCH6   | 1:10                    | 0.5                       | 0.34                               |
|                                    | BATCH7   | 1:10                    | 1.2                       | 0.17                               |
|                                    | ZnF-BRCT | 1:10                    | 1.24                      | 0.83                               |
|                                    | ZnF DEL  | 1:10                    | 0.12                      | 0.15                               |
| Halo-Lig3K421A- XRCC1-YFP          | BATCH1   | 1:10                    | 0.35                      | 0.17                               |
| Halo-Lig3K421A- XRCC1-YFP          | BATCH 2  | 1:10                    | 0.62                      | 0.23                               |

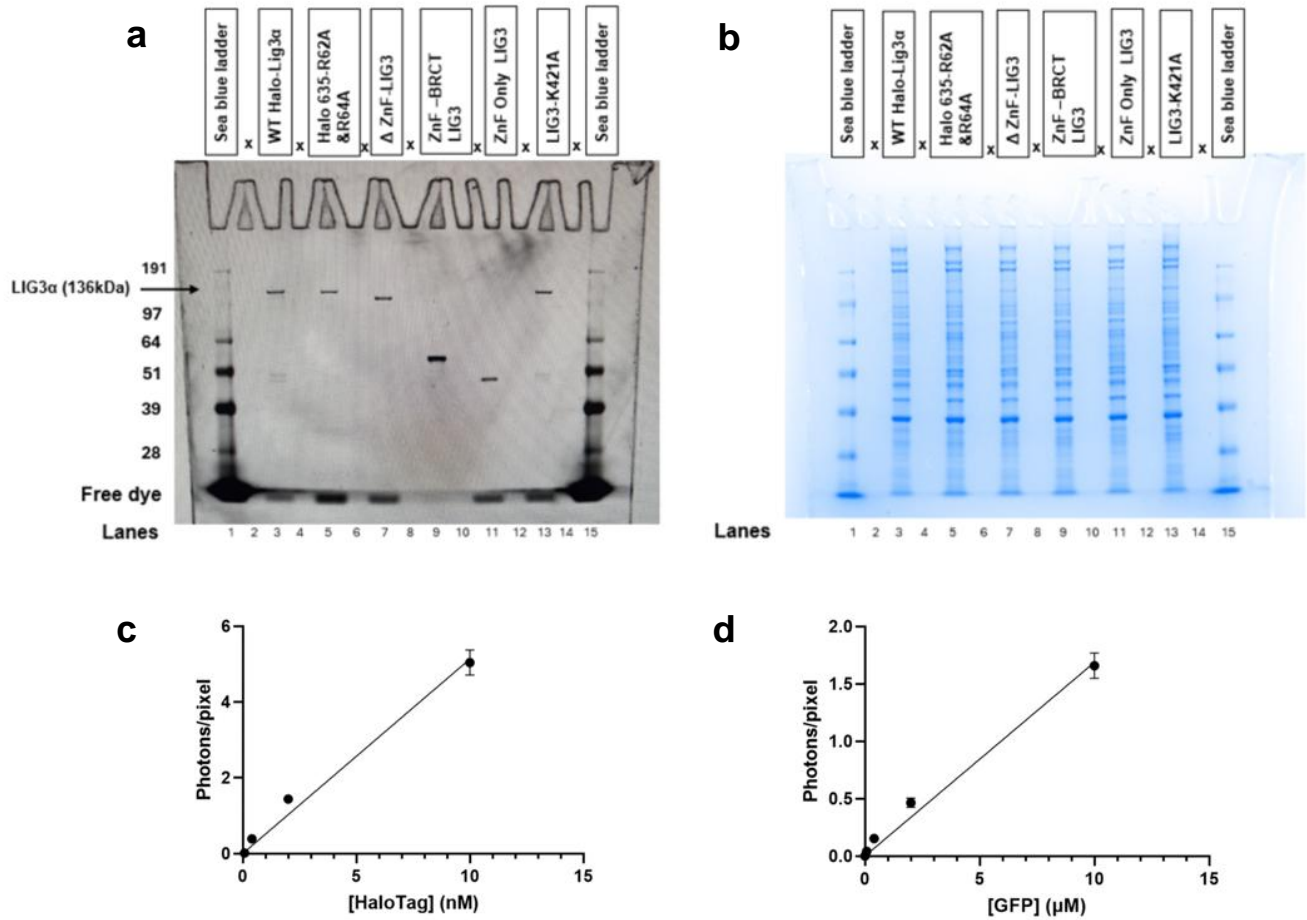

**Fig. S1: Characterization of expressed proteins in our extract :** (a) SDS-PAGE analysis of all Halo Tag-LIG3α variants used for the study. (b) Since Halo Tag dye (JF-635) crosslinks to the protein after labelling, Halo Tag fluorescence was directly imaged after running the denaturation gel, Coomassie blue gel staining. (c) Standard curves collected on purified Halo-Tag protein conjugated to JF-635 (d) GFP standard with a linear fit (these curves have been adapted from SMADNE paper <https://doi.org/10.1093/nar/gkad095> Supplement fig1). In support of Figure 1.

**Fig. S1**

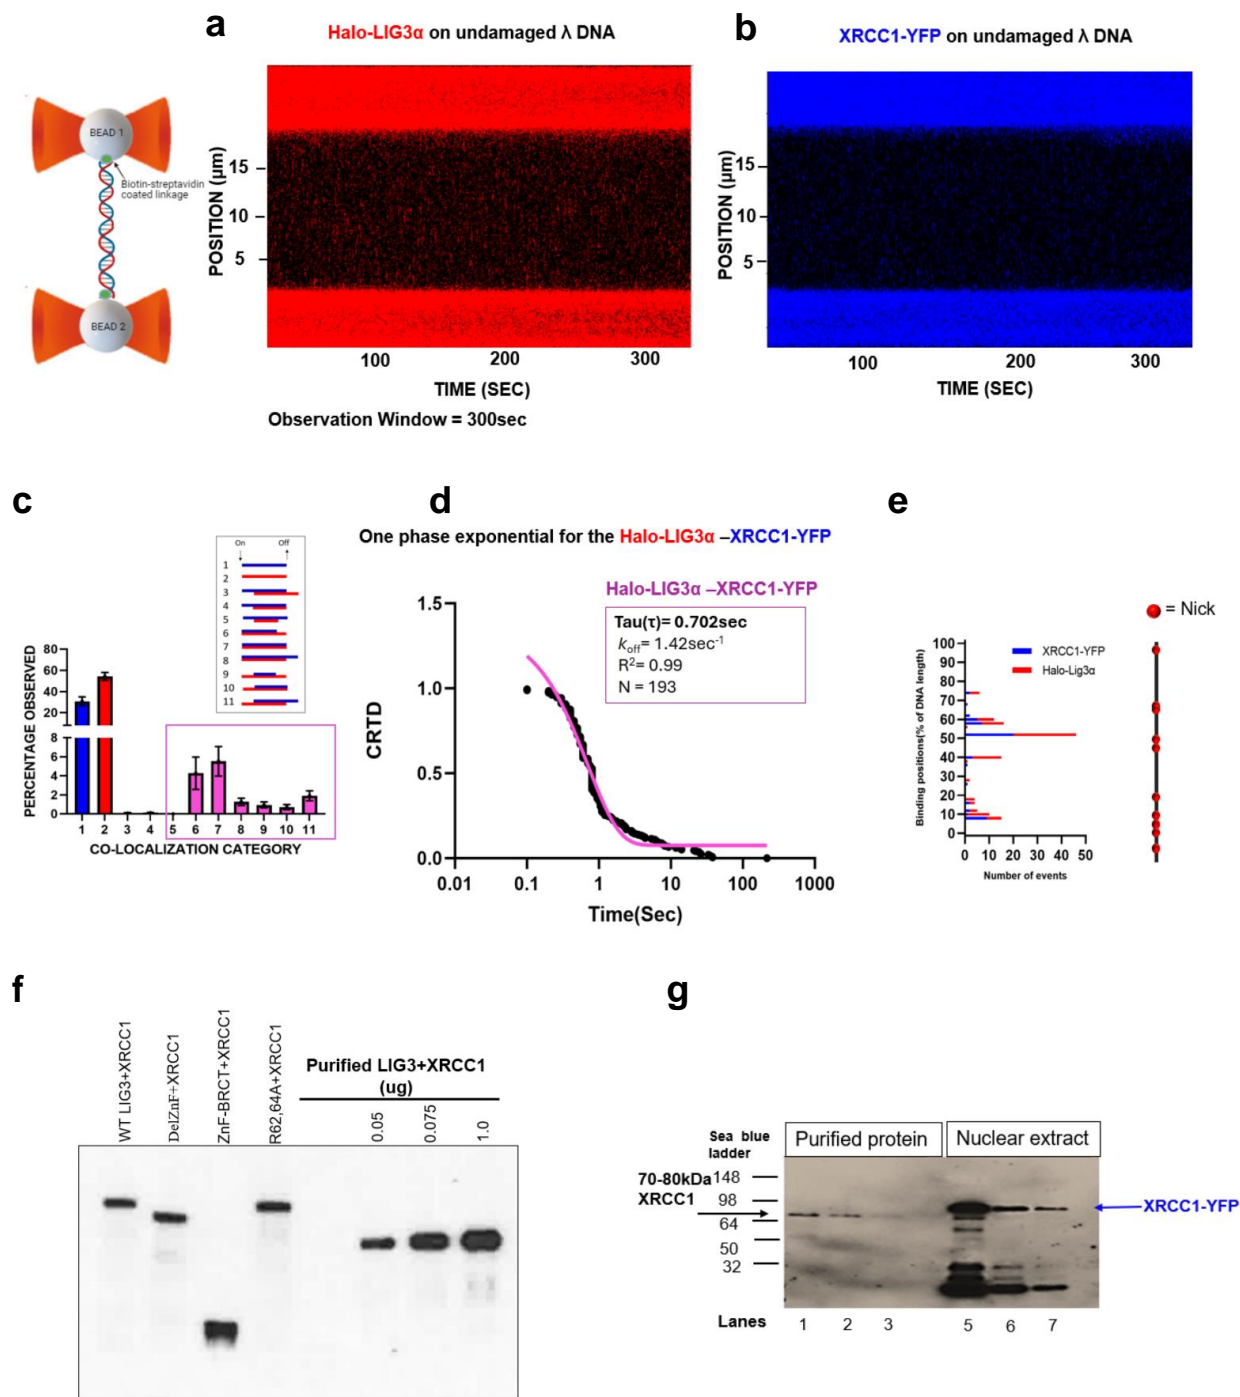

**Fig. S2:** SMADNE analysis of Halo 635-LIG3 $\alpha$ -XRCC1-YFP binding to an un-damaged  $\lambda$  DNA substrate. **(a)** Representative five-minute kymograph of Halo-635-LIG3 $\alpha$  on an un-damaged  $\lambda$ DNA. There were no events observed during this window at 10pN tension. **(b)** Representative five-minute kymograph of XRCC1-YFP on an un-damaged  $\lambda$ DNA. There were no events observed during this window at 10pN tension (note: both the kymographs are taking from the same window just the laser color is adjusted according to the frequency of fluoro-dye tags). **(c)** The distribution of the 11 categories for Halo 635-LIG3 $\alpha$  and XRCC1-YFP binding nicked  $\lambda$  DNA. Error bars represent the SEM of fourteen experiments. **(d)** Cumulative residence time distribution (CRTD) for a set of (N=193) co-localized binding events of Halo 635-LIG3 $\alpha$ -XRCC1-YFP on the nicked  $\lambda$  DNA, with a single exponential fit shown in pink. **(e)** Binding positional analysis of Halo 635-LIG3 $\alpha$ -XRCC1-YFP shown at the expected sites, that were bound multiple times to the nicked  $\lambda$  DNA digested with nicking enzyme Nt.BspQ1 generating eight observable ligatable nicks. **(f)** Western blots for extracts with LIG3 $\alpha$  variants and the WT-LIG3 $\alpha$  on the left and purified LIG3 $\alpha$ -XRCC1 on the right lanes. **(h)** Western blots for extracts overexpressing XRCC1-YFP, with bands corresponding to endogenous XRCC1 in 3, 1.5, 0.75  $\mu$ L nuclear extract lane. Purified XRCC1 was loaded in initial 1-3 lanes. In support of Figure 1.

**Fig. S2**

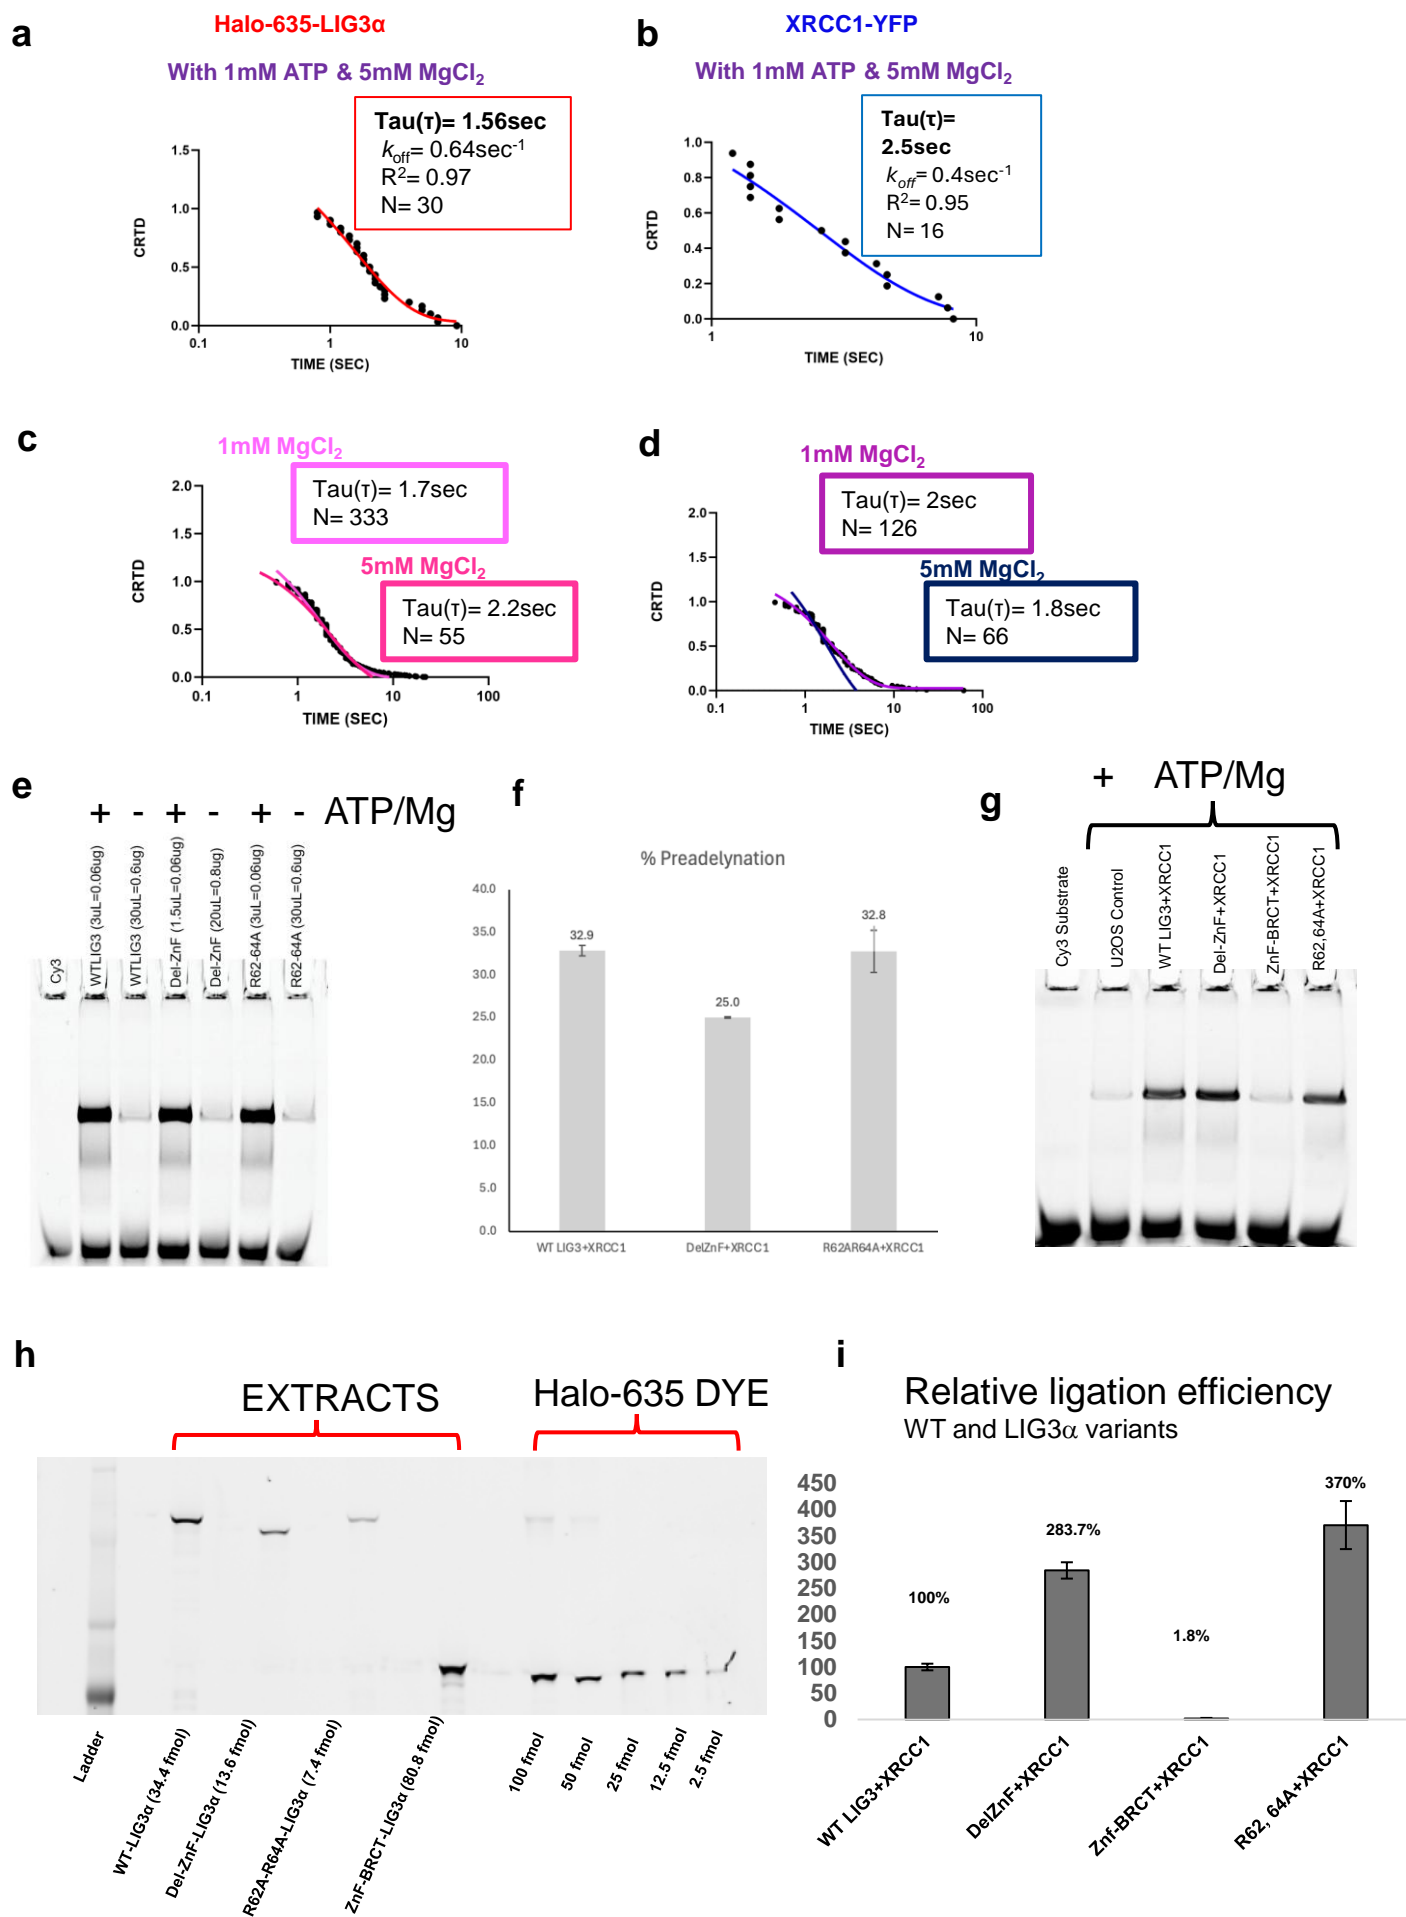

**Fig. S3**

See next page for figure legend

Fig. S3 **(a)** Cumulative residence time distribution (CRTD) for Halo-635-LIG3 $\alpha$  in presence of 1mM ATP and 5mM MgCl<sub>2</sub>. **(b)** Cumulative residence time distribution (CRTD) for XRCC1-YFP in presence of 1mM ATP and 5mM MgCl<sub>2</sub>. **(c)** Cumulative residence time distribution (CRTD) for Halo-635-LIG3 $\alpha$  in presence of 1mM (pink) or 5 mM MgCl<sub>2</sub> (red). **(d)** Cumulative residence time distribution (CRTD) for XRCC1-YFP in presence of 1mM MgCl<sub>2</sub> (purple) and 5mM (blue). **(e)** Ligation assay in all the variants of LIG3 $\alpha$  used in nuclear extracts in absence or presence of 1 mM ATP and 10 mM MgCl<sub>2</sub>. **(f)** Based on the absence of ATP/MgCl<sub>2</sub> lanes, the amount of preadelynated LIG3 in nuclear extracts. **(g)** Relative ligation efficiencies from nuclear extracts fractions in the presence of 1 mM ATP and 10 mM MgCl<sub>2</sub>. **(h)** SDS gel showing relative protein concentrations. **(i)** Ligation efficiency of WT and LIG3 $\alpha$  variants corrected for relative protein concentrations and background ligase activity in our nuclear extracts. In support of Figure 2.



## Halo-635-LIG3α

**a**

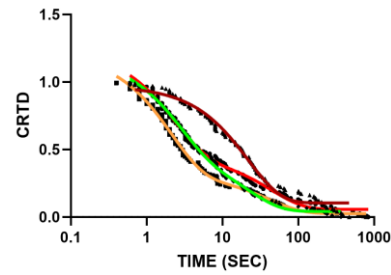

SHL -4.5

$\text{Tau}(\tau) = 17.34 \pm 3.2 \text{ sec}$   
N= 115

SHL -2.5

$\text{Tau}(\tau) = 12.2 \pm 3.5 \text{ sec}$   
N= 149

SHL 0

$\text{Tau}(\tau) = 10.3 \pm 2.2 \text{ sec}$   
N= 91

UD-NCP

$\text{Tau}(\tau) = 23.6 \pm 0.63 \text{ sec}$   
N= 99

**b**

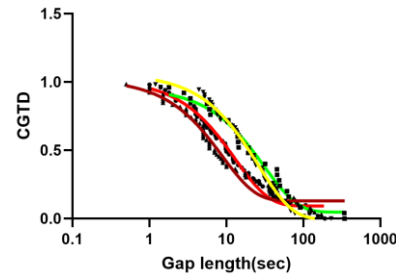

SHL -4.5

$k_{on} = 4.5 \pm 0.1 \times 10^8 \text{ (M}^{-1}\text{s}^{-1}\text{)}$   
N= 51

SHL -2.5

$k_{on} = 2.25 \pm 0.07 \times 10^8 \text{ (M}^{-1}\text{s}^{-1}\text{)}$   
N= 54

SHL 0

$k_{on} = 3.35 \pm 0.3 \times 10^8 \text{ (M}^{-1}\text{s}^{-1}\text{)}$   
N= 25

UD-NCP

$k_{on} = 1.3 \pm 0.08 \times 10^9 \text{ (M}^{-1}\text{s}^{-1}\text{)}$   
N= 66

## XRCC1-YFP

**c**

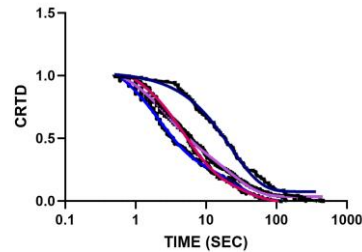

SHL -4.5

$\text{Tau}(\tau) = 11 \pm 1.7 \text{ sec}$   
N= 171

SHL -2.5

$\text{Tau}(\tau) = 14.04 \pm 0.8 \text{ sec}$   
N= 236

SHL 0

$\text{Tau}(\tau) = 12.7 \pm 6.2 \text{ sec}$   
N= 830

UD-NCP

$\text{Tau}(\tau) = 34.05 \pm 0.04 \text{ sec}$   
N= 100

**d**

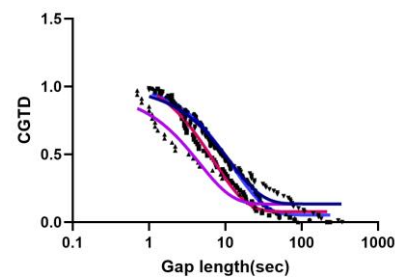

SHL -4.5

$k_{on} = 1.3 \pm 0.05 \times 10^8 \text{ (M}^{-1}\text{s}^{-1}\text{)}$   
N= 64

SHL -2.5

$k_{on} = 2.4 \pm 0.17 \times 10^7 \text{ (M}^{-1}\text{s}^{-1}\text{)}$   
N= 59

SHL 0

$k_{on} = 1.75 \pm 0.25 \times 10^8 \text{ (M}^{-1}\text{s}^{-1}\text{)}$   
N= 34

UD-NCP

$k_{on} = 6.67 \pm 0.5 \times 10^7 \text{ (M}^{-1}\text{s}^{-1}\text{)}$   
N= 78

**Fig. S5: Combined CRTD/CGTD plots of LIG3α-XRCC1 (a,b)** Comparative combined CRTD & CGTD plots for LIG3α binding to SHL-4.5, SHL-2.5, SHL0 & UD-NCP. **(c,d)** Comparative combined CRTD & CGTD plots for XRCC1 binding to SHL-4.5, SHL-2.5, SHL0 & UD-NCP. In support of Figure 6.

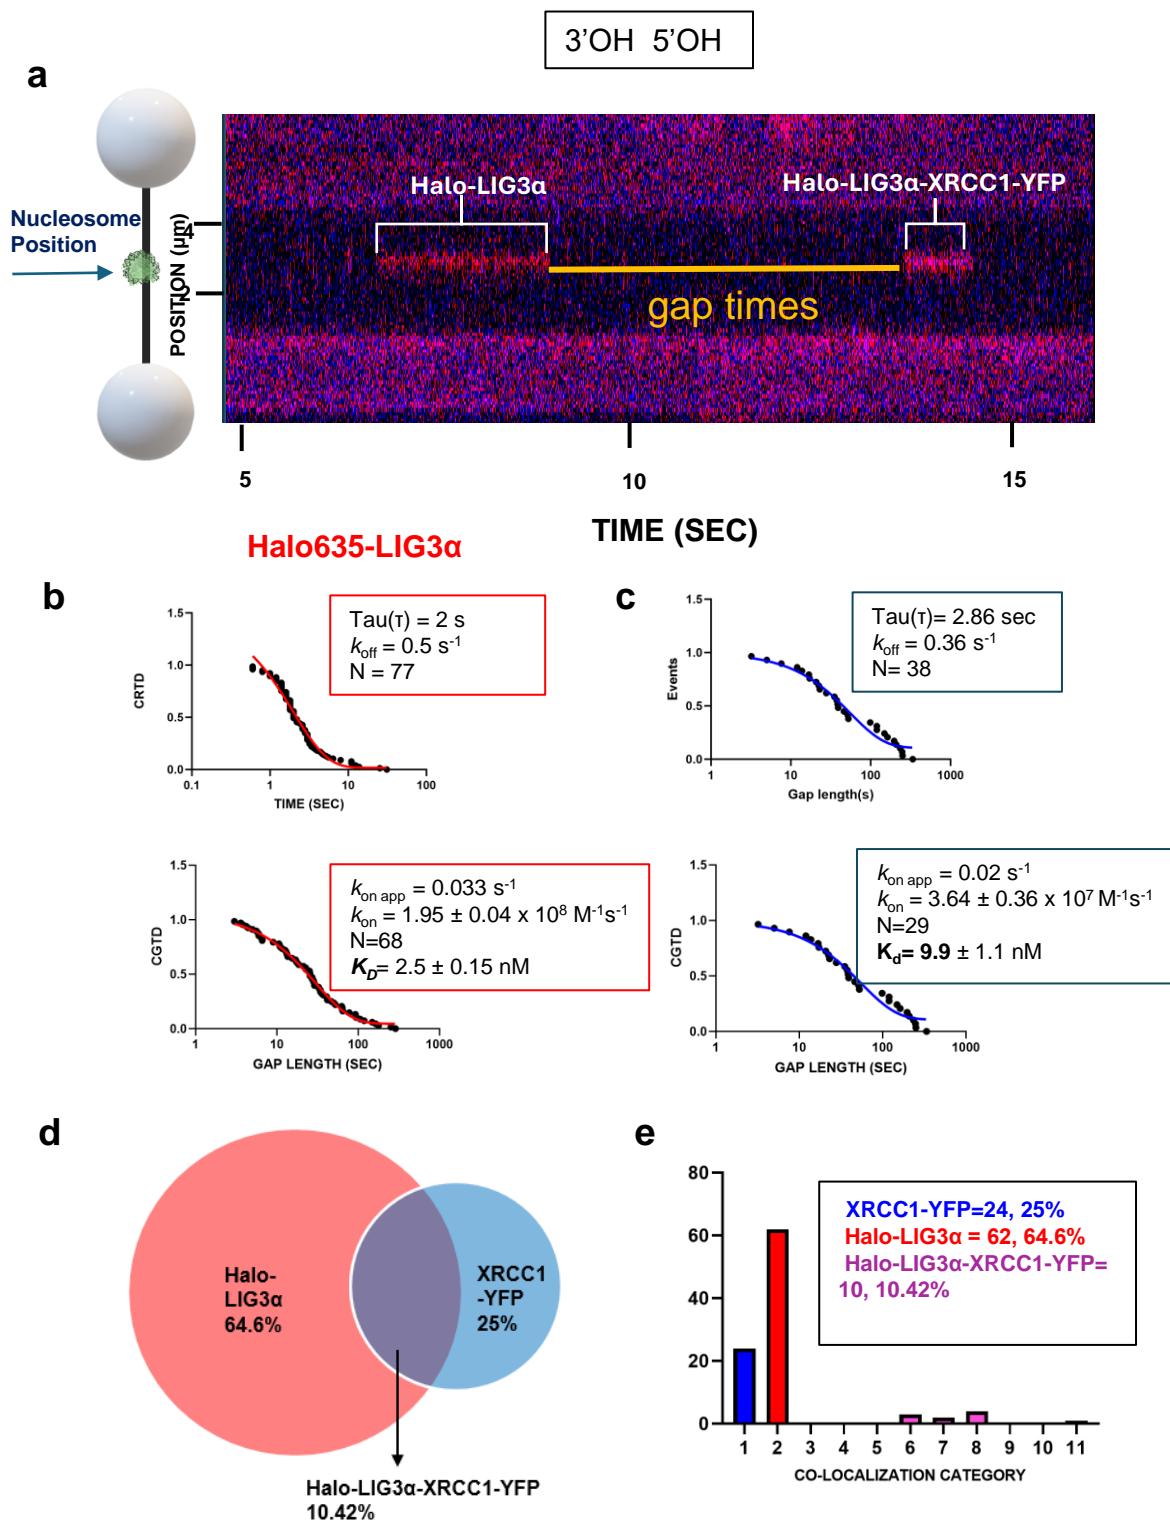

**Fig. S6: Binding kinetics of Halo 635-LIG3α-XRCC1-YFP to one non-ligatable nick substrate.** (a) A corresponding kymograph of an observation for Halo 635-LIG3α-XRCC1-YFP binding to a non-ligatable nick  $\lambda$  DNA. (b) Cumulative residence time distribution (CRTD) and cumulative gap time distribution (CGTD), analysis for Halo 635-LIG3α binding a non-ligatable nick, with a single exponential fit shown in red. (c) Cumulative residence time distribution (CRTD) and cumulative gap time distribution (CGTD), analysis for XRCC1-YFP binding, a non-ligatable nick with a single exponential fit shown in blue. (d) Percentage of events that were Halo 635-LIG3α alone in red and XRCC1-YFP alone in blue, or colocalized together in the middle as pink. (e) The distribution of the 11 categories for Halo 635-LIG3α and XRCC1-YFP binding to a non-ligatable nick. Error bars represent the SEM of two experiments. In support of Figure 6.
